# Supplementary material for: Derepression of the USP22-FASN axis by p53 loss under oxidative stress drives lipogenesis and tumorigenesis
Source: PubMed Central journal article supplement (PMC9636132; doi:10.1038/s41420-022-01241-9), 2022-11-04

**Figure 1**

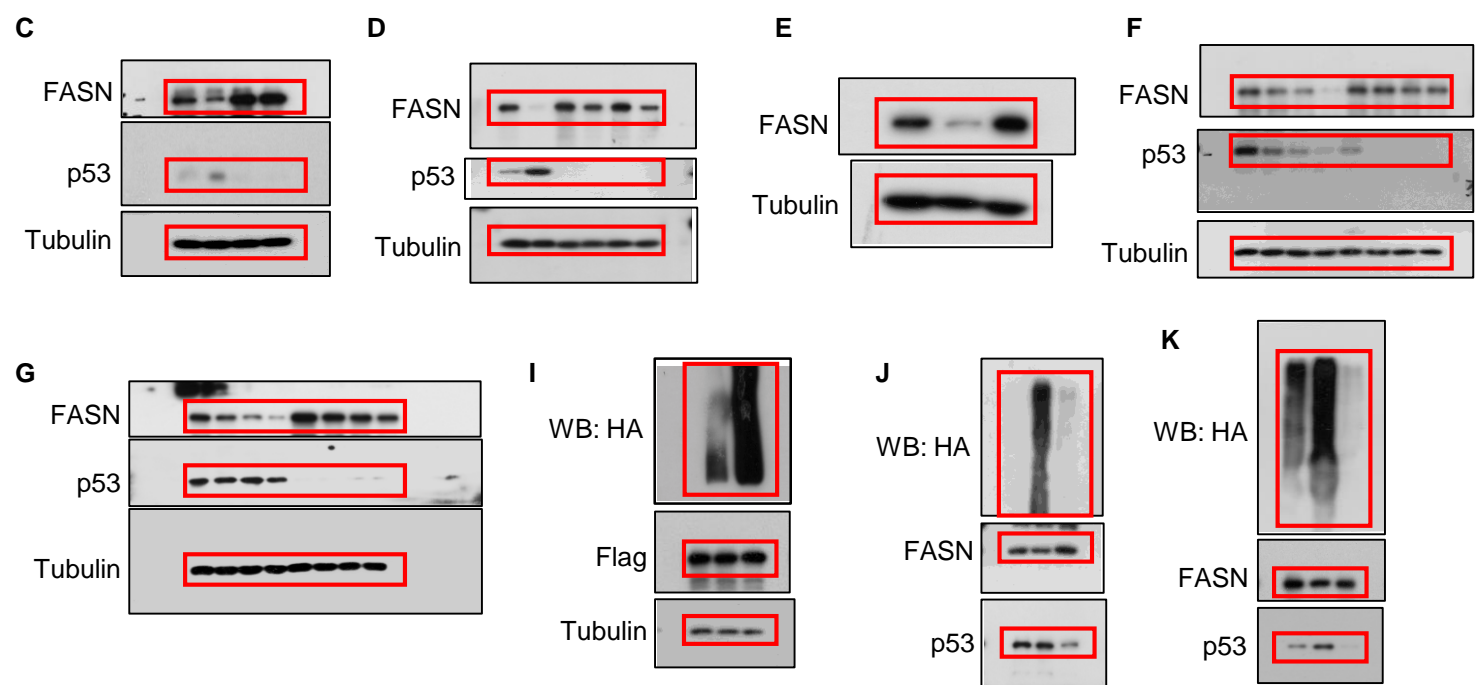

**Figure 2**

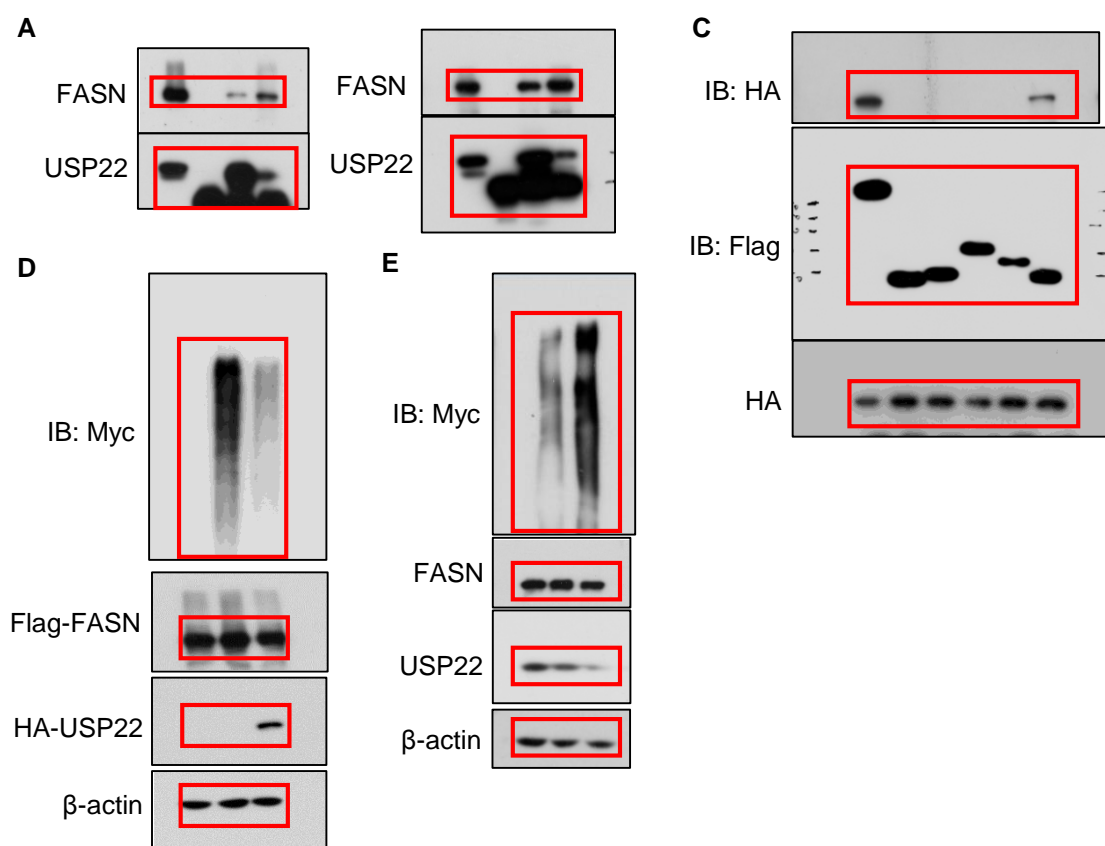

**Figure 3**

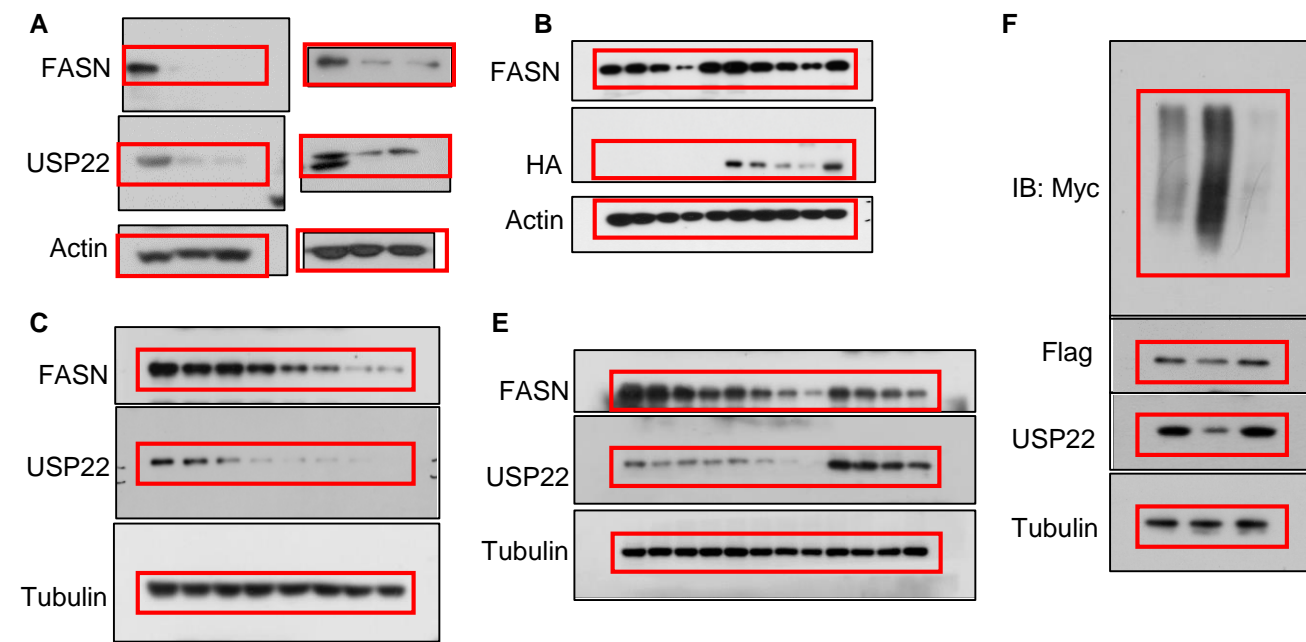

**Figure 4**

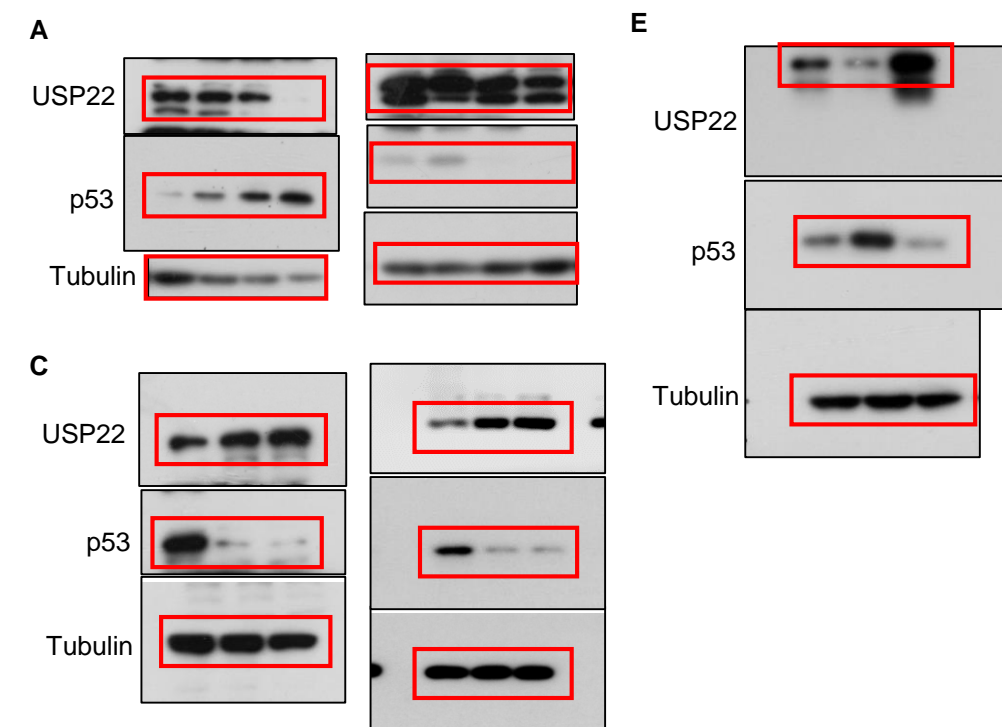

**Figure 5**

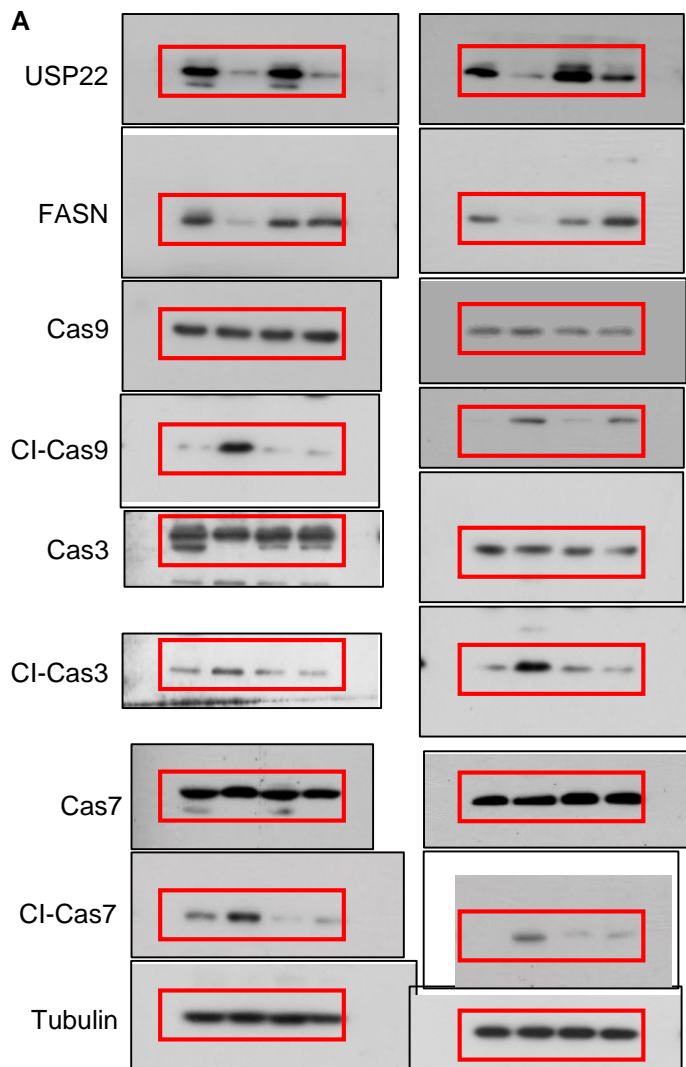

**Figure 6**

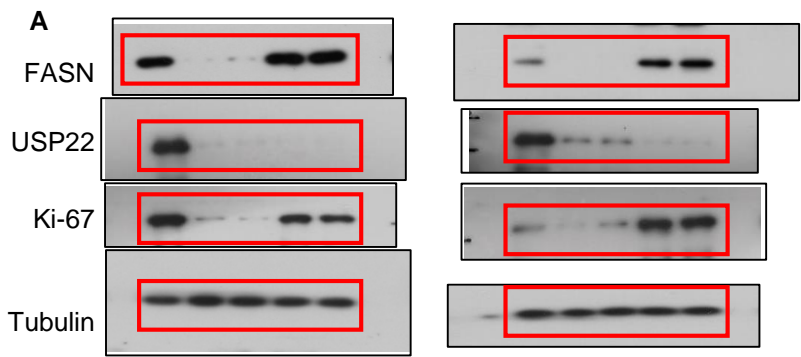

**Fig.S1**

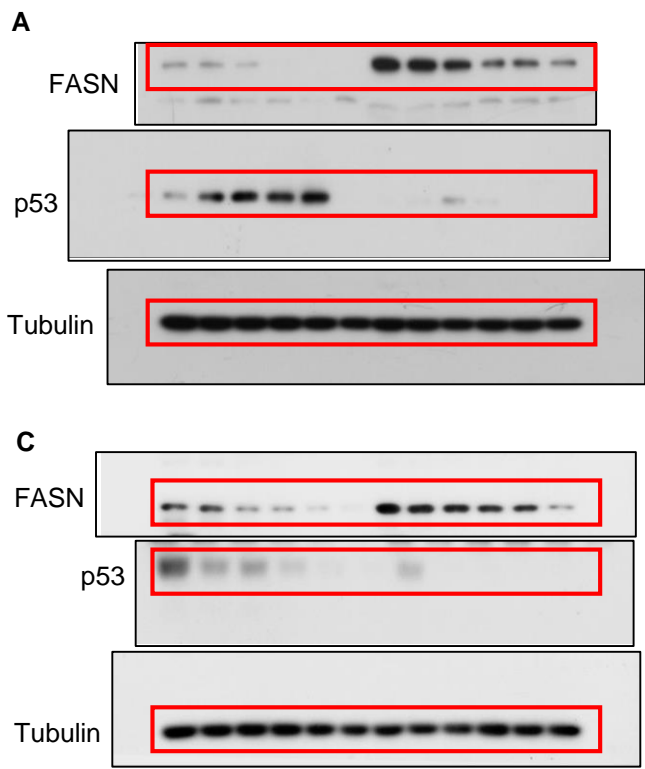

**Fig.S2**

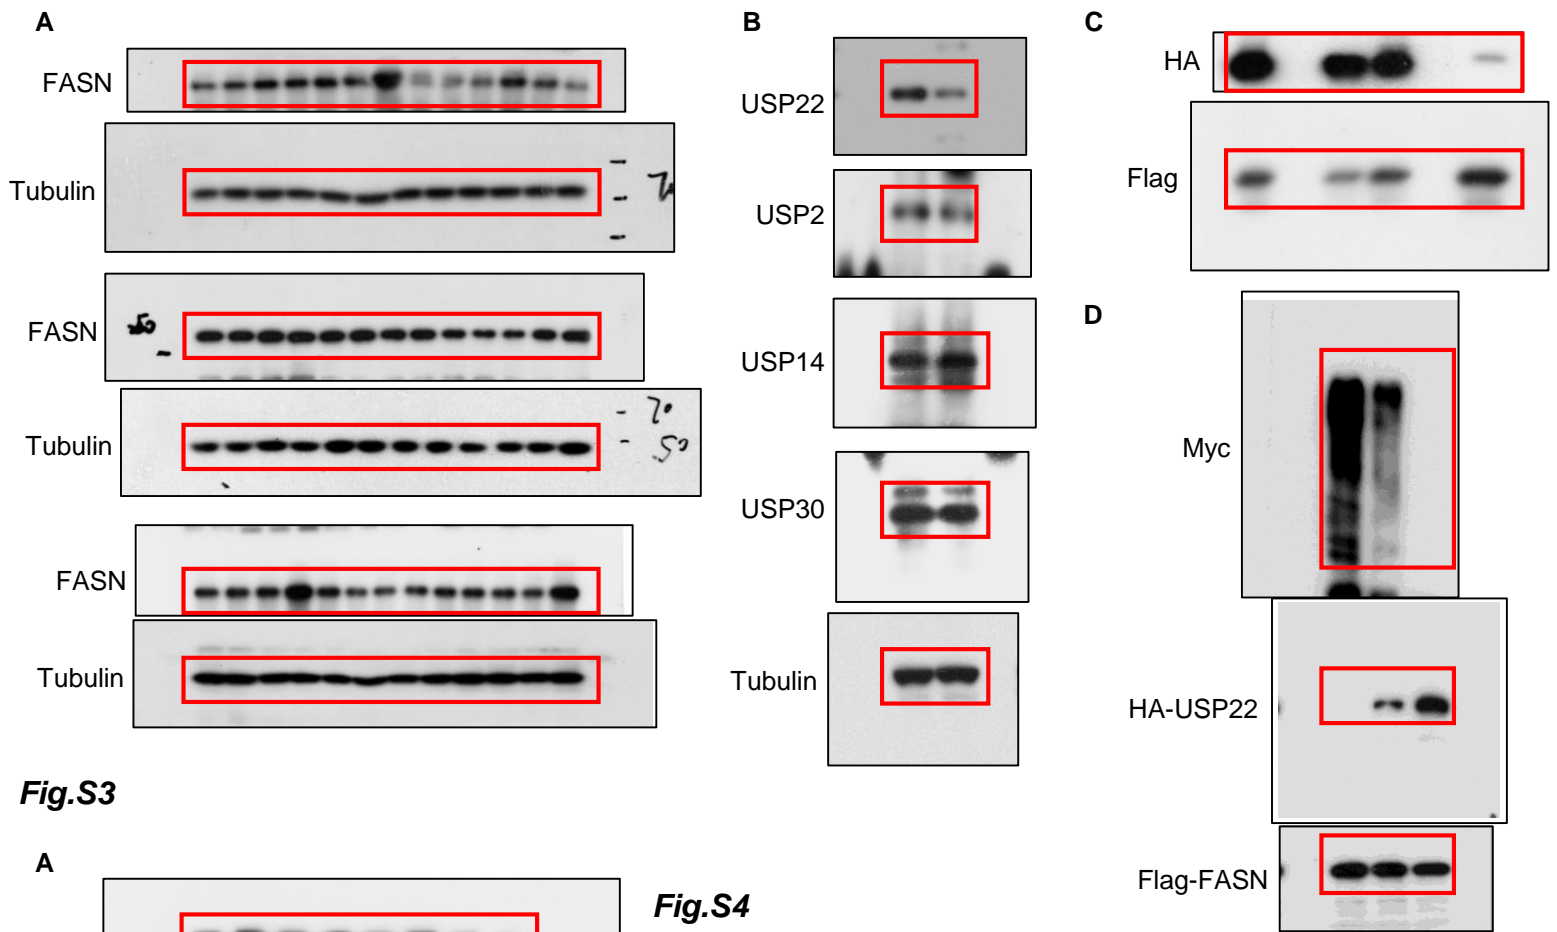

**Fig.S3**

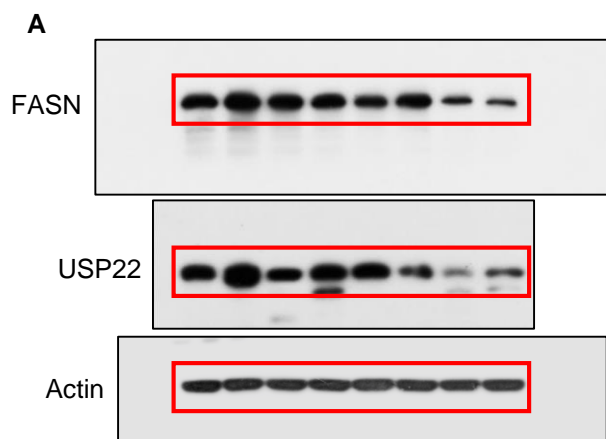

**Fig.S4**

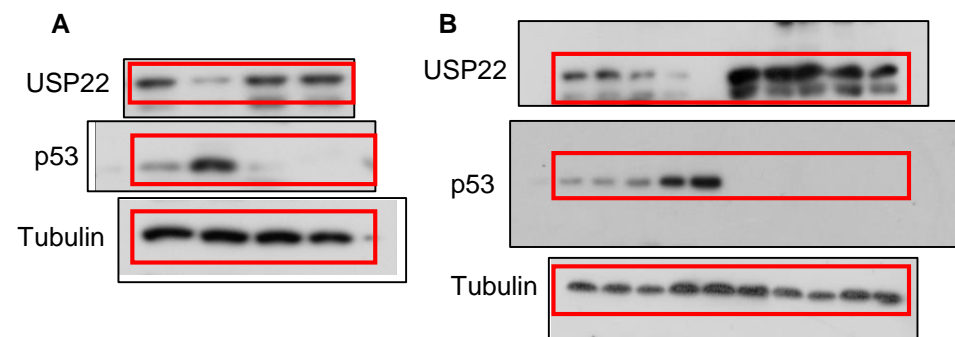

Supplement: 41420_2022_1241_MOESM2_ESM.pdf [file 41420_2022_1241_MOESM2_ESM.pdf]
